# Supplementary material
Source: Springer Nature journal article supplement (https://www.springermedizin.de/resource/supplementary/12888_2012_1426_MOESM1_ESM.pdf/9480176)
Supplement: MOESM1 [file 9480176]

Adult population of  
Norwegian tourists evacuated from South  
East Asia after the 2004 tsunami  
N = 2468

Did not return the  
questionnaire, n = 1569

Baseline evaluation (T1)  
6 months post-disaster  
Participation, N = 899

Did not return the  
questionnaire, n = 225

Participation at follow-up  
only, n = 506

Follow-up (T2)  
24 months post-disaster  
Participation, N = 674 (75%)  
**Study population**
